# Supplementary material for: Implementation of Guidelines for Healthier Canteens in Dutch Secondary Schools: A Process Evaluation
Source: PubMed Central journal article supplement (PMC6887932; doi:10.3390/ijerph16224509), 2019-11-15
Supplement: ijerph-16-04509-s001.pdf [file ijerph-16-04509-s001.pdf]

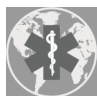

# Implementation of Guidelines for Healthier Canteens in Dutch Secondary Schools: A Process Evaluation

Irma J. Evenhuis <sup>1,\*</sup>, Ellis L. Vyth <sup>1</sup>, Lydian Veldhuis <sup>2</sup>, Suzanne M. Jacobs <sup>2</sup>, Jacob C. Seidell <sup>1</sup> and Carry M. Renders <sup>1</sup>

## Supplementary Materials

**Table S1.** The stated questions to assess the perceived factors affecting implementation, including the Cronbach's Alpha.

| Factors                                  | Items   | Questions                                                                                                                                                                                                                                                                                                                                                                                                                                                                                                                                                          | Answer Options | Baseline | After Intervention | Conclusion                                 |
|------------------------------------------|---------|--------------------------------------------------------------------------------------------------------------------------------------------------------------------------------------------------------------------------------------------------------------------------------------------------------------------------------------------------------------------------------------------------------------------------------------------------------------------------------------------------------------------------------------------------------------------|----------------|----------|--------------------|--------------------------------------------|
| <i>Individual factors</i>                |         |                                                                                                                                                                                                                                                                                                                                                                                                                                                                                                                                                                    |                |          |                    |                                            |
| Knowledge                                | 3 items | 1. Role Clarity: For me it is clear what activities I have to do to make the school canteen healthier.<br>2. Knowledge: I have all the information I need to make the school canteen healthier.<br>3. Knowledge: I have enough knowledge to make the school canteen healthier.                                                                                                                                                                                                                                                                                     | 5-point Scale  | <0.60    | <0.70              | Analyse separate                           |
| Self-efficacy                            | 6 items | 1. I find it easy to do my tasks regarding the implementation of a healthier school canteen.<br>2. Other tasks conflict to perform my tasks for the healthier school canteen.<br>3. I am confident that I can change the offer in the canteen.<br>4. I am confident that I can increase the number of healthier products in the canteen.<br>5. I am confident that I can change the accessibility of healthier products of the canteen.<br>6. I am confident that I can perform my tasks, even if there are barriers (e.g., lack of time/motivation of colleagues) | 5-point Scale  | >0.70    | >0.70              | Analyse together                           |
| Attitude–Belief and Outcome expectations | 9 items | <i>See below</i>                                                                                                                                                                                                                                                                                                                                                                                                                                                                                                                                                   | 5-point Scale  | >0.70    | >0.70              | Analyse together                           |
| Attitude-Beliefs                         | 3 items | 1. I find it pleasant to do my tasks regarding the implementation of a healthier school canteen.<br>2. I feel good, when I perform tasks regarding the healthier canteen.<br>3. I feel myself stressed/sad/nervous, when I                                                                                                                                                                                                                                                                                                                                         | 5-point Scale  | >0.70    | <0.60              | Analyse together with outcome expectations |

|                               |         |                                                                                                                                                                                                                                                                                                                                                                                                                                                                                                                                                                                                               |               |       |       |                               |
|-------------------------------|---------|---------------------------------------------------------------------------------------------------------------------------------------------------------------------------------------------------------------------------------------------------------------------------------------------------------------------------------------------------------------------------------------------------------------------------------------------------------------------------------------------------------------------------------------------------------------------------------------------------------------|---------------|-------|-------|-------------------------------|
|                               |         | perform tasks regarding the healthier canteen.                                                                                                                                                                                                                                                                                                                                                                                                                                                                                                                                                                |               |       |       |                               |
| Attitude-Outcome expectations | 6 items | <p>1. The effects of a healthier school canteen are visible for me.</p> <p>2. Performing my tasks regarding a healthier school canteen gives me many advantages.</p> <p>3. If I perform my tasks for the healthier school canteen the canteen will get a healthier offer.</p> <p>4. If I perform my tasks for the healthier school canteen the accessibility of a healthier offer in the canteen will increase.</p> <p>5. If I perform my tasks for the healthier school canteen students will eat more healthily.</p> <p>6. Performing my tasks for the healthier school canteen, gives me satisfaction.</p> | 5-point Scale | >0.70 | >0.60 | Analyse together with beliefs |
| Social Influence              | 3 items | <p>1. Descriptive Norm: Colleagues perform their healthier school canteen activities good.</p> <p>2. Subjective Norm: Other people expect me to perform my healthier school canteen activities good.</p> <p>3. Social Support: I am receiving enough support in performing my healthier school canteen activities</p>                                                                                                                                                                                                                                                                                         | 5-point Scale | <0.60 | <0.70 | Analyse separately            |
| Routine                       | 2 items | <p>1. Regularly, I control whether I perform all my tasks for the healthier school canteen.</p> <p>2. For me it is easy to remember what I have to do to create a healthier school canteen.</p>                                                                                                                                                                                                                                                                                                                                                                                                               | 5-point Scale | >0.70 | >0.70 | Analyse together              |
| Intention                     | 1 item  | I want to create a healthier school canteen in the coming 6 months.                                                                                                                                                                                                                                                                                                                                                                                                                                                                                                                                           | 5-point Scale | X     | X     | X                             |
| Motivation                    | 1 item  | I am motivated to create a healthier school canteen.                                                                                                                                                                                                                                                                                                                                                                                                                                                                                                                                                          | 5-point Scale | X     | X     | X                             |
| Skills                        | 1 item  | My skills are sufficient to create a healthier school canteen.                                                                                                                                                                                                                                                                                                                                                                                                                                                                                                                                                | 5-point Scale | X     | X     | x                             |
| Professional Role             | 2 items | <p>1. In my opinion, it is my task to change the offer of food and drinks in the canteen, to a healthier offer.</p> <p>2. In my opinion, it is my task to change the accessibility of the canteen, to a healthier accessibility.</p>                                                                                                                                                                                                                                                                                                                                                                          | 5-point Scale | >0.70 | >0.70 | Analyse combined              |
| Behavioural regulation        | 3 items | <p>1. Self-monitoring: Performing my tasks for the healthier school canteen has become a habit.</p> <p>2. Action Planning: I am having a clear plan of how I will perform my tasks for the healthier school canteen properly.</p> <p>3. Action Planning: I am having a clear plan of how I will perform my tasks for the healthier school canteen properly, even</p>                                                                                                                                                                                                                                          | 5-point scale | >0.70 | >0.70 | Analyse together              |

when there will arise barriers (lack of time, unmotivated stakeholders).

| <i>Environmental factors</i>     |         |                                                                                                                                                                                                                                                                                                                                                                                                                                                                                                                                                                                                                                                                                                                                                                    |               |       |       |                    |
|----------------------------------|---------|--------------------------------------------------------------------------------------------------------------------------------------------------------------------------------------------------------------------------------------------------------------------------------------------------------------------------------------------------------------------------------------------------------------------------------------------------------------------------------------------------------------------------------------------------------------------------------------------------------------------------------------------------------------------------------------------------------------------------------------------------------------------|---------------|-------|-------|--------------------|
| Need for support                 | 3 items | 1. I need more information to perform my tasks regarding a healthier school canteen.<br>2. I need more training to perform my tasks regarding a healthier school canteen.<br>3. I need more support to perform my tasks regarding a healthier school canteen.                                                                                                                                                                                                                                                                                                                                                                                                                                                                                                      | 5-point scale | >0.60 | >0.70 | Analyse together   |
| Innovation                       | 2 items | 1. The guidelines are in consistence with my usual work.<br>2. The guidelines can be adapted to the vision of my school.                                                                                                                                                                                                                                                                                                                                                                                                                                                                                                                                                                                                                                           | 5-point scale | <0.60 | <0.60 | Analyse separately |
| Perceived organisational support | 7 items | 1. There are sufficient financial resources to perform my tasks regarding the healthier school canteen.<br>2. I perceive having enough time to perform my tasks regarding the healthier school canteen.<br>3. In my organisation, the coordination of the healthier school canteen is well arranged.<br>4. In my organisation, we made formal agreements about the tasks regarding the healthier school canteen.<br>5. In my organisation, we have enough human resources to perform the tasks regarding the healthier school canteen.<br>6. In my organisation, we have enough facilities to perform the tasks regarding the healthier school canteen.<br>7. In my organisation, I am being informed about the process of the healthier school canteen regularly. | 5-point scale | >0.70 | >0.60 | Analyse together   |

**Table S2.** The stated questions to assess the quality of implementation, including the Cronbach's Alpha.

| Factors                                                                 | Items   | Questions                                                                                                                                                                                                                                                                                                                                                                                                                              | Answer Options       | After Intervention | Conclusion       |
|-------------------------------------------------------------------------|---------|----------------------------------------------------------------------------------------------------------------------------------------------------------------------------------------------------------------------------------------------------------------------------------------------------------------------------------------------------------------------------------------------------------------------------------------|----------------------|--------------------|------------------|
| Dose received                                                           | 1 item  | Have you received the [implementation tool]                                                                                                                                                                                                                                                                                                                                                                                            | Yes/No               | X                  | X                |
| Dose received                                                           | 1 item  | Have you read/used the [implementation tool]                                                                                                                                                                                                                                                                                                                                                                                           | Yes/No               | X                  | X                |
| <i>Satisfaction with:</i>                                               |         |                                                                                                                                                                                                                                                                                                                                                                                                                                        |                      |                    |                  |
| Schools' questionnaire                                                  | 1 item  | This questionnaire was understandable.                                                                                                                                                                                                                                                                                                                                                                                                 | 5-point Likert Scale | X                  | X                |
| Stakeholders questionnaire                                              | 1 item  | This questionnaire was understandable.                                                                                                                                                                                                                                                                                                                                                                                                 | 5-point Likert Scale | X                  | X                |
| Canteen Scan                                                            | 3 items | 1. It is clear how the Canteen Scan needs to be filled out.<br>2. The given advices are applicable to our situation.<br>3. It is feasible to fill out the Canteen Scan.                                                                                                                                                                                                                                                                | 5-point Likert Scale | >0.70              | Analyse together |
| Advisory meeting and report                                             | 3 items | 1. The advisory report was clear.<br>2. The advisory report gives practical advices.<br>3. The advisory report gives feasible advices.                                                                                                                                                                                                                                                                                                 | 5-point Likert Scale | >0.70              | Analyse together |
| Communication materials (information brochures, poster, website-banner) | 6 items | 1. The given information and advices in the information brochure were clear.<br>2. The given information was practical applicable.<br>3. The given information was feasible.<br>4. The brochure 'Guidelines for Healthier Canteens' was clear.<br>5. The brochure 'Guidelines for Healthier Canteens' gives practical information.<br>6. The information and advices in the brochure 'Guidelines for Healthier Canteens' are feasible. | 5-point Likert Scale | >0.70              | Analyse together |
| Online community                                                        | 5 items | 1. It was easy to post messages on the Facebook community.<br>2. It was clear how to use the Facebook community.<br>3. The Facebook community gives practical applicable information.<br>4. The Facebook community gives feasible information.<br>5. I will advise colleagues to make use of the Facebook community.                                                                                                                   | 5-point Likert Scale | >0.70              | Analyse together |
| Newsletter                                                              | 6 items | 1. The information in the newsletter was clear.<br>2. The newsletter contained practical information.<br>3. The newsletter contained feasible information.<br>4. I was satisfied with the length of the newsletter.<br>5. I was satisfied with the attractiveness of the format.                                                                                                                                                       | 5-point Likert Scale | >0.70              | Analyse together |

6. I was satisfied with the frequency (once per 6 weeks) of the newsletter.

---

|                      |         |                                                                                                                                                                                                                                                                         |                      |       |                  |
|----------------------|---------|-------------------------------------------------------------------------------------------------------------------------------------------------------------------------------------------------------------------------------------------------------------------------|----------------------|-------|------------------|
| Student's fact sheet | 5 items | 1. The fact sheet was clear.<br>2. The fact sheet was practical and applicable to our situation.<br>3. The fact sheet gives feasible information.<br>4. I was satisfied with the length of the fact sheet.<br>5. I was satisfied with the attractiveness of the format. | 5-point Likert Scale | >0.70 | Analyse together |
|----------------------|---------|-------------------------------------------------------------------------------------------------------------------------------------------------------------------------------------------------------------------------------------------------------------------------|----------------------|-------|------------------|

---
